# Supplementary material
Source: PubMed Central journal article supplement (PMC1890819)
Supplement: blood_blood-2006-11-059071_1.pdf [file blood_blood-2006-11-059071_1.pdf]

| Probe set    | Gene                                                                                | Accession | CD4Cre-Ctnnb <sup>ex3</sup> # |        |       |        |        |
|--------------|-------------------------------------------------------------------------------------|-----------|-------------------------------|--------|-------|--------|--------|
|              |                                                                                     |           | 1                             | 2      | 3     | 4      | 5      |
|              |                                                                                     |           | Fold upregulation             |        |       |        |        |
| 1431014_at   | cat eye syndrome chromosome region, candidate 2 homolog (human)                     | AK013061  | 1162.8                        | 1248.9 | 916.0 | 1089.4 | 1134.5 |
| 1453851_a_at | growth arrest and DNA-damage-inducible 45 gamma                                     | AK007410  | 919.3                         | 937.7  | 477.8 | 787.2  | 724.0  |
| 1417900_a_at | very low density lipoprotein receptor                                               | NM_013703 | 105.3                         | 98.5   | 91.7  | 143.9  | 155.7  |
| 1432205_a_at | RIKEN cDNA 5730592G18 gene                                                          | AK002529  | 105.1                         | 93.1   | 45.0  | 73.2   | 66.9   |
| 1426263_at   | TSLC1-like 2                                                                        | AY059394  | 70.5                          | 52.4   | 39.2  | 62.6   | 47.7   |
| 1454838_s_at | expressed sequence AW548124                                                         | BB323985  | 60.9                          | 52.0   | 18.2  | 34.7   | 58.6   |
| 1455622_at   | RIKEN cDNA D130074J02 gene                                                          | BB461988  | 46.3                          | 26.9   | 26.8  | 52.2   | 54.0   |
| 1428074_at   | RIKEN cDNA 2310037P21 gene                                                          | AK009669  | 34.5                          | 39.7   | 20.2  | 28.1   | 30.7   |
| 1417960_at   | cytoplasmic polyadenylation element binding protein 1                               | NM_007755 | 33.9                          | 37.3   | 19.6  | 29.3   | 28.0   |
| 1459202_at   | cDNA, RIKEN full-length enriched library, clone:C130034D14                          | BB366565  | 29.0                          | 31.1   | 13.4  | 26.7   | 15.5   |
| 1417400_at   | retinoic acid induced 14                                                            | AF274866  | 27.3                          | 33.9   | 24.2  | 26.1   | 27.9   |
| 1421623_at   | interleukin 12 receptor, beta 2                                                     | NM_008354 | 26.9                          | 33.9   | 12.7  | 14.4   | 13.2   |
| 1429463_at   | protein kinase, AMP-activated, alpha 2 catalytic subunit                            | AI891575  | 22.9                          | 17.2   | 19.4  | 34.0   | 34.3   |
| 1419853_a_at | DnaJ (Hsp40) homolog, subfamily B, member 9                                         | AI552982  | 22.2                          | 20.5   | 20.1  | 10.4   | 12.5   |
| 1423760_at   | CD44 antigen                                                                        | BC005676  | 20.5                          | 9.6    | 13.2  | 19.6   | 21.5   |
| 1440637_at   | Mus musculus transcribed sequences                                                  | BG074656  | 20.3                          | 19.0   | 25.2  | 24.2   | 17.2   |
| 1422046_at   | integrin alpha M                                                                    | NM_008401 | 17.1                          | 22.4   | 9.6   | 14.8   | 10.9   |
| 1439341_at   | transcribed sequence with weak similarity to protein pir:T00340 (H.sapiens)         | BB203252  | 16.2                          | 19.9   | 6.6   | 12.9   | 9.8    |
| 1447559_at   | Mus musculus transcribed sequences                                                  | AI834762  | 15.9                          | 13.0   | 11.6  | 15.1   | 12.2   |
| 1450770_at   | RIKEN cDNA 3632451O06 gene                                                          | BC023359  | 15.4                          | 40.0   | 15.2  | 30.4   | 30.0   |
| 1417542_at   | ribosomal protein S6 kinase, polypeptide 2                                          | NM_011299 | 14.8                          | 10.1   | 7.0   | 10.7   | 9.6    |
| 1420136_a_at | transcribed sequence weak similarity to protein ref:NP_081764.1 (M.musculus)        | AI427540  | 13.6                          | 9.3    | 22.7  | 11.5   | 13.1   |
| 1416686_at   | procollagen lysine, 2-oxoglutarate 5-dioxygenase 2                                  | NM_011961 | 13.5                          | 14.0   | 3.7   | 4.9    | 6.2    |
| 1433683_at   | Mus musculus, clone IMAGE:5345177, mRNA                                             | BF124648  | 12.6                          | 5.1    | 8.2   | 14.5   | 11.2   |
| 1418199_at   | hemogen                                                                             | NM_053149 | 11.7                          | 16.2   | 6.8   | 8.2    | 8.7    |
| 1421505_at   | Mix1 homeobox-like 1 (Xenopus laevis)                                               | AF154573  | 10.9                          | 12.1   | 6.6   | 11.4   | 11.2   |
| 1422629_s_at | shroom                                                                              | NM_015756 | 9.4                           | 7.3    | 4.6   | 10.1   | 5.2    |
| 1419063_at   | UDP-glucuronosyltransferase 8                                                       | BC016885  | 9.3                           | 5.2    | 8.0   | 8.0    | 17.2   |
| 1434766_at   | cDNA, RIKEN full-length enriched library, clone:A530052M18                          | BQ175911  | 8.5                           | 6.9    | 5.8   | 8.4    | 8.6    |
| 1427483_at   | RIKEN cDNA 2610016M12 gene                                                          | BF578055  | 8.5                           | 7.3    | 6.4   | 7.6    | 8.1    |
| 1418168_at   | BDG-29 protein                                                                      | BC005674  | 8.4                           | 6.4    | 9.7   | 4.1    | 5.7    |
| 1435981_at   | cDNA, RIKEN full-length enriched library, clone:A430017F18                          | BM118398  | 8.0                           | 5.4    | 3.7   | 5.2    | 5.0    |
| 1451342_at   | spondin 1, (f-spondin) extracellular matrix protein                                 | BC020531  | 7.4                           | 1.3    | 11.0  | 11.1   | 11.6   |
| 1418734_at   | histocompatibility 2, Q region locus 1                                              | U96752    | 7.4                           | 0.3    | 5.2   | 8.2    | 8.4    |
| 1456315_a_at | protein tyrosine phosphatase-like (proline instead of catalytic arginine), member a | BB014781  | 7.4                           | 7.5    | 3.7   | 5.4    | 5.3    |
| 1455359_at   | RIKEN cDNA C130080N23 gene                                                          | BB794593  | 7.3                           | 4.2    | 5.4   | 6.3    | 5.7    |
| 1428484_at   | oxysterol binding protein-like 3                                                    | AK004768  | 7.1                           | 7.0    | 9.4   | 5.1    | 4.1    |
| 1418835_at   | pleckstrin homology-like domain, family A, member 1                                 | NM_009344 | 7.0                           | 6.0    | 5.2   | 8.0    | 6.6    |
| 1417777_at   | leukotriene B4 12-hydroxydehydrogenase                                              | BC014865  | 6.8                           | 9.3    | 3.0   | 5.2    | 4.4    |
| 1444780_at   | Mus musculus transcribed sequences                                                  | BI656658  | 6.8                           | 5.7    | 4.1   | 6.4    | 5.6    |
| 1423854_a_at | RIKEN cDNA 1190017B18 gene                                                          | BC008101  | 6.7                           | 6.6    | 2.9   | 4.3    | 3.1    |
| 1451474_a_at | DNA segment, Chr 13, ERATO Doi 275, expressed                                       | BC022679  | 6.4                           | 5.4    | 3.5   | 4.6    | 4.8    |
| 1440721_at   | cDNA, RIKEN full-length enriched library, clone:5930433N17                          | C85455    | 6.2                           | 5.1    | 3.9   | 6.1    | 4.4    |
| 1442467_at   | Mus musculus mRNA for mKIAA3015 protein                                             | AU067780  | 6.1                           | 3.5    | 4.3   | 9.1    | 7.1    |
| 1434451_at   | Mus musculus transcribed sequences                                                  | AA216953  | 6.0                           | 4.5    | 3.6   | 5.9    | 5.6    |
| 1444706_at   | cDNA, RIKEN full-length enriched library, clone:D930039P20                          | BB527432  | 6.0                           | 5.8    | 4.4   | 5.1    | 3.8    |
| 1416441_at   | RIKEN cDNA 1190003P12 gene                                                          | NM_018755 | 6.0                           | 5.3    | 3.0   | 4.0    | 4.1    |
| 1433642_at   | RIKEN cDNA C230032K13 gene                                                          | BB384173  | 5.9                           | 6.7    | 3.0   | 3.8    | 4.3    |
| 1417928_at   | reversion induced LIM gene                                                          | NM_019417 | 5.8                           | 16.8   | 7.0   | 4.7    | 4.0    |
| 1419334_at   | cytotoxic T-lymphocyte-associated protein 4                                         | NM_009843 | 5.8                           | 11.2   | 4.7   | 5.7    | 4.5    |
| 1421620_at   | interleukin 5 receptor, alpha                                                       | NM_008370 | 5.5                           | 5.3    | 3.0   | 5.9    | 4.7    |
| 1441030_at   | cDNA, RIKEN full-length enriched library, clone:B230308H11                          | BB308974  | 5.5                           | 6.5    | 8.6   | 11.7   | 13.8   |
| 1426324_at   | histocompatibility 2, L region                                                      | M33151    | 5.1                           | 5.8    | 4.9   | 5.8    | 5.8    |
| 1457605_at   | Mus musculus transcribed sequences                                                  | BB818797  | 4.9                           | 4.1    | 3.8   | 7.5    | 5.2    |
| 1440372_at   | Mus musculus transcribed sequences                                                  | AI785253  | 4.8                           | 4.3    | 3.7   | 5.9    | 4.2    |
| 1436864_at   | Mus musculus transcribed sequences                                                  | BM214060  | 4.7                           | 4.5    | 3.7   | 5.1    | 3.8    |
| 1435926_at   | RIKEN cDNA E030003F13 gene                                                          | BB529627  | 4.7                           | 5.6    | 2.9   | 4.7    | 4.3    |
| 1441769_at   | Mus musculus transcribed sequences                                                  | BB731108  | 4.7                           | 4.8    | 3.7   | 5.2    | 4.4    |
| 1440586_at   | RIKEN cDNA B430203I24 gene                                                          | BB326079  | 4.6                           | 4.3    | 4.1   | 6.2    | 4.7    |
| 1459143_at   | Mus musculus transcribed sequences                                                  | BB667403  | 4.6                           | 5.1    | 3.3   | 4.4    | 3.9    |
| 1417490_at   | cathepsin B                                                                         | BC006656  | 4.6                           | 4.1    | 2.7   | 4.0    | 3.6    |

| Probe set           | Gene                                                                             | Accession | CD4Cre-Ctnnb <sup>ex3</sup> # |      |      |      |      |
|---------------------|----------------------------------------------------------------------------------|-----------|-------------------------------|------|------|------|------|
|                     |                                                                                  |           | 1                             | 2    | 3    | 4    | 5    |
|                     |                                                                                  |           | Fold upregulation             |      |      |      |      |
| 1420678_a_at        | interleukin 17 receptor B                                                        | NM_019583 | 4.4                           | 5.5  | 3.5  | 5.6  | 4.2  |
| 1439895_at          | transcribed sequence with moderate similarity to protein pir:S12207 (M.musculus) | BG069874  | 4.3                           | 4.7  | 3.5  | 4.7  | 3.7  |
| 1431118_at          | RIKEN cDNA 6720427H10 gene                                                       | BB664131  | 4.2                           | 4.4  | 3.8  | 4.9  | 4.1  |
| 1445695_at          | Mus musculus transcribed sequences                                               | BE852876  | 4.2                           | 3.5  | 4.9  | 8.7  | 5.5  |
| 1417376_a_at        | immunoglobulin superfamily, member 4                                             | NM_018770 | 4.1                           | 4.1  | 9.7  | 5.4  | 2.7  |
| 1451504_at          | RIKEN cDNA 0610041L09 gene                                                       | BC021941  | 3.9                           | 4.8  | 3.2  | 3.9  | 3.6  |
| 1453255_at          | solute carrier family 43, member 1                                               | AK011417  | 3.8                           | 4.4  | 2.9  | 4.1  | 3.9  |
| 1437599_at          | cDNA, RIKEN full-length enriched library, clone:D930013C14                       | BM246546  | 3.4                           | 3.7  | 3.8  | 5.2  | 3.9  |
| Fold downregulation |                                                                                  |           |                               |      |      |      |      |
| 1442424_at          | Mus musculus transcribed sequences                                               | BB368771  | 2.5                           | -    | 15.2 | 11.4 | 13.2 |
| 1449273_at          | cytoplasmic FMR1 interacting protein 2                                           | NM_133769 | 3.4                           | 4.5  | 2.7  | 4.3  | 3.9  |
| 1418633_at          | Notch gene homolog 1 (Drosophila)                                                | NM_008714 | 3.9                           | 3.9  | 2.9  | 4.5  | 3.4  |
| 1421919_a_at        | chemokine (C-C motif) receptor 9                                                 | NM_009913 | 4.2                           | 3.7  | 4.9  | 6.0  | 4.3  |
| 1421604_a_at        | Kruppel-like factor 3 (basic)                                                    | NM_008453 | 4.5                           | 5.7  | 5.9  | 7.0  | 5.9  |
| 1420643_at          | lunatic fringe gene homolog (Drosophila)                                         | AK004642  | 4.7                           | 8.7  | 3.0  | 4.2  | 4.3  |
| 1435330_at          | expressed sequence AI447904                                                      | BG092516  | 4.7                           | 5.9  | 3.1  | 4.2  | 4.3  |
| 1429254_at          | aquaporin 11                                                                     | BF472491  | 5.3                           | 23.5 | 3.9  | 3.4  | 38.6 |
| 1435740_at          | Mus musculus cDNA clone IMAGE:4021344, partial cds                               | AV286259  | 5.4                           | 6.0  | 3.8  | 6.4  | 6.6  |
| 1416882_at          | regulator of G-protein signalling 10                                             | NM_026418 | 5.5                           | 5.2  | 2.8  | 6.7  | 5.6  |
| 1452815_at          | purinergic receptor P2Y, G-protein coupled 10                                    | AK020001  | 5.5                           | 4.1  | 4.8  | 7.4  | 6.1  |
| 1422188_s_at        | T-cell receptor gamma, variable 4                                                | NM_011558 | 5.8                           | 5.7  | 3.2  | 6.9  | 6.5  |
| 1457141_at          | Mus musculus transcribed sequences                                               | BB229969  | 5.9                           | 15.0 | 4.4  | 3.2  | 21.5 |
| 1418084_at          | neuropilin                                                                       | NM_008737 | 6.0                           | 3.9  | 4.2  | 6.2  | 5.3  |
| 1416529_at          | epithelial membrane protein 1                                                    | U25633    | 6.5                           | 4.4  | 19.7 | 6.8  | 9.4  |
| 1458126_at          | RIKEN cDNA D030041H20 gene                                                       | BB443518  | 6.7                           | 6.5  | 4.5  | 4.5  | 3.9  |
| 1439956_at          | cDNA, RIKEN full-length enriched library, clone:A530049N04                       | BE692425  | 6.9                           | 11.1 | 3.1  | 5.9  | 4.0  |
| 1421073_a_at        | prostaglandin E receptor 4 (subtype EP4)                                         | NM_008965 | 7.3                           | 7.1  | 3.9  | 5.3  | 5.7  |
| 1458802_at          | hypothetical protein A130075N07                                                  | BB164127  | 7.9                           | 8.4  | 2.7  | 6.4  | 5.8  |
| 1437636_at          | gb:BB135602                                                                      | BB135602  | 8.2                           | 10.8 | 3.5  | 13.1 | 5.6  |
| 1448390_a_at        | retinal short-chain dehydrogenase/reductase 1                                    | NM_011303 | 8.9                           | 19.1 | 16.2 | 14.7 | 10.4 |
| 1416930_at          | lymphocyte antigen 6 complex, locus D                                            | NM_010742 | 9.4                           | 10.1 | 7.1  | 28.5 | 14.6 |
| 1423466_at          | chemokine (C-C motif) receptor 7                                                 | BB204380  | 11.6                          | -    | 9.2  | 16.3 | 7.9  |
| 1416630_at          | inhibitor of DNA binding 3                                                       | NM_008321 | 18.4                          | 13.1 | 2.7  | 9.3  | 11.4 |
| 1421214_at          | cytidine monophospho-N-acetylneuraminic acid hydroxylase                         | BE287856  | 18.7                          | 12.8 | 6.0  | 17.2 | 17.9 |
| 1419394_s_at        | S100 calcium binding protein A8 (calgranulin A)                                  | NM_013650 | 19.3                          | 26.2 | 4.6  | 18.0 | 4.5  |
| 1448756_at          | S100 calcium binding protein A9 (calgranulin B)                                  | NM_009114 | 21.9                          | 30.3 | 4.9  | 19.4 | 6.6  |
| 1456522_at          | Mus musculus transcribed sequences                                               | BB168244  | -                             | -    | -    | 6.6  | -    |

-: the expression is below background
