# Supplementary material
Source: PubMed Central journal article supplement (PMC1890819)
Supplement: blood_blood-2006-11-059071_2.pdf [file blood_blood-2006-11-059071_2.pdf]

| Probe set    | Gene                                                          | Accession | Lymphoma #        |      |      |      |      |      |      |      |
|--------------|---------------------------------------------------------------|-----------|-------------------|------|------|------|------|------|------|------|
|              |                                                               |           | 1                 | 2    | 3    | 4    | 5    | 6    | 7    | 8    |
|              |                                                               |           | Fold upregulation |      |      |      |      |      |      |      |
| 1457917_at   | complement component 3                                        | K02782    | 4.5               | 20.3 | 37.2 | 34.8 | 11.6 | 4.7  | 16.9 | 77.1 |
| 1440721_at   | Mus musculus cDNA clone IMAGE:30046293, partial cds           | AV111366  | 4.2               | 13.2 | 27.7 | 14.5 | 23.9 | 23.1 | 17.0 | 33.4 |
| 1458058_at   | chemokine (C-C motif) ligand 6                                | BC002073  | 12.0              | 17.0 | 15.0 | 9.9  | 5.4  | 19.8 | 7.6  | 42.3 |
| 1458309_at   | serine (or cysteine) proteinase inhibitor, clade E, member 2  | NM_009255 | 8.6               | 17.6 | 16.3 | 12.4 | 16.6 | 15.6 | 13.1 | 20.2 |
| 1439412_at   | POU domain, class 2, associating factor 1                     | NM_011136 | 8.2               | 13.3 | 20.5 | 8.5  | 26.6 | 23.0 | 3.3  | 15.7 |
| 1427655_a_at | insulin-like growth factor binding protein 7                  | AI790558  | 11.2              | 18.4 | 5.7  | 14.1 | 19.1 | 7.1  | 22.2 | 14.9 |
| 1440188_at   | dopa decarboxylase                                            | AF071068  | 4.7               | 20.7 | 4.2  | 6.1  | 15.7 | 19.5 | 17.4 | 20.5 |
| 1444942_at   | ras homolog gene family, member AB                            | BC018275  | 22.9              | 24.8 | 14.1 | 9.3  | 5.4  | 12.6 | 6.7  | 11.6 |
| 1429254_at   | H19 fetal liver mRNA                                          | NM_023123 | 29.7              | 16.2 | 1.2  | 8.6  | 20.7 | 4.8  | 6.4  | 18.3 |
| 1427532_at   | serum amyloid A 3                                             | NM_011315 | 2.8               | 17.7 | 11.9 | 5.8  | 8.2  | 14.2 | 9.4  | 32.7 |
| 1439315_at   | nuclear factor, erythroid derived 2, like 3                   | NM_010903 | 35.0              | 21.2 | 3.7  | 9.6  | 4.0  | 2.9  | 4.8  | 18.1 |
| 1445148_at   | hormonally upregulated Neu-associated kinase                  | NM_015755 | 19.4              | 13.0 | 7.2  | 14.4 | 4.6  | 12.5 | 12.0 | 9.4  |
| 1457063_at   | Mus musculus transcribed sequences                            | AI450842  | 1.6               | 3.2  | 33.6 | 16.6 | 15.7 | 1.6  | 7.8  | 10.6 |
| 1420166_at   | Mus musculus transcribed sequences                            | AU067644  | 7.2               | 6.5  | 14.2 | 12.0 | 11.1 | 7.0  | 8.0  | 11.8 |
| 1418065_at   | Fc receptor-like 3                                            | BC027310  | 1.7               | 14.7 | 4.2  | 4.0  | 2.1  | 20.2 | 1.2  | 28.2 |
| 1438837_at   | Mus musculus transcribed sequences                            | AV222628  | 5.1               | 12.6 | 16.1 | 5.9  | 12.1 | 12.9 | 0.8  | 7.9  |
| 1458050_at   | CD5 antigen-like                                              | NM_009690 | 2.1               | 9.3  | 6.7  | 5.2  | 3.4  | 11.5 | 4.8  | 30.0 |
| 1447792_x_at | serine (or cysteine) proteinase inhibitor, clade G, member 1  | NM_009776 | 3.0               | 6.4  | 14.7 | 11.6 | 4.5  | 2.4  | 4.0  | 24.0 |
| 1421604_a_at | adenylate kinase 5                                            | AB060081  | 14.3              | 11.2 | 7.2  | 7.5  | 8.0  | 7.2  | 6.5  | 5.1  |
| 1443894_at   | lamin A                                                       | NM_019390 | 8.4               | 7.9  | 12.4 | 8.3  | 7.1  | 12.6 | 4.3  | 4.8  |
| 1451474_a_at | Fc receptor, IgG, low affinity III                            | NM_010188 | 4.1               | 8.8  | 8.3  | 5.5  | 3.5  | 5.9  | 3.4  | 22.7 |
| 1457141_at   | immunoglobulin joining chain                                  | BC006026  | 1.2               | 9.8  | 22.6 | 10.7 | 3.9  | 0.7  | 4.3  | 9.2  |
| 1447214_at   | myelocytomatosis oncogene                                     | BC006728  | 10.1              | 8.0  | 5.0  | 7.5  | 6.5  | 7.9  | 7.9  | 5.8  |
| 1439686_at   | RIKEN cDNA D330017J20 gene                                    | BB098407  | 2.7               | 7.8  | 5.1  | 1.9  | 15.3 | 13.7 | 2.5  | 8.1  |
| 1417481_at   | phospholipase A2, group IID                                   | AF169407  | 1.3               | 6.3  | 12.1 | 9.3  | 3.4  | 0.9  | 5.7  | 17.9 |
| 1419028_at   | fibrinogen-like protein 2                                     | NM_008013 | 0.7               | 7.7  | 3.3  | 2.9  | 17.7 | 9.8  | 1.4  | 11.6 |
| 1448929_at   | RIKEN cDNA 3110007P09 gene                                    | BC017596  | 14.1              | 10.2 | 8.7  | 4.2  | 4.1  | 1.4  | 4.3  | 7.1  |
| 1438894_at   | cDNA clone MGC:51479 IMAGE:4012958, complete cds              | BB404446  | 9.9               | 7.1  | 3.8  | 4.8  | 6.8  | 10.3 | 4.4  | 6.2  |
| 1439897_at   | transferrin receptor                                          | NM_011638 | 8.2               | 4.9  | 7.3  | 6.8  | 6.2  | 3.4  | 5.2  | 9.4  |
| 1418776_at   | apolipoprotein E                                              | AK019319  | 2.2               | 4.5  | 7.6  | 7.0  | 5.5  | 7.6  | 4.1  | 12.5 |
| 1419480_at   | cDNA clone MGC:64659 IMAGE:6402346, complete cds              | BF580053  | 9.8               | 8.4  | 4.1  | 3.7  | 6.6  | 9.2  | 3.9  | 5.3  |
| 1418912_at   | naked cuticle 1 homolog (Drosophila)                          | NM_027280 | 9.4               | 6.4  | 5.4  | 3.6  | 7.8  | 7.7  | 1.6  | 7.6  |
| 1429794_a_at | mucolin 2                                                     | AK014467  | 5.1               | 7.2  | 6.9  | 5.4  | 7.0  | 8.0  | 2.7  | 6.6  |
| 1447272_s_at | complement component 1, q subcomponent, polypeptide           | NM_007572 | 4.0               | 7.5  | 4.6  | 4.9  | 3.3  | 6.3  | 3.3  | 14.7 |
| 1443772_at   | lysozyme                                                      | AW208566  | 3.0               | 6.3  | 7.7  | 6.6  | 4.4  | 2.7  | 4.4  | 11.4 |
| 1449038_at   | RIKEN cDNA 2610307O08 gene                                    | AV300716  | 1.7               | 2.8  | 14.2 | 7.8  | 4.3  | 4.5  | 2.2  | 8.7  |
| 1422494_s_at | kelch domain containing 2                                     | AV298107  | 7.4               | 9.1  | 5.4  | 4.6  | 4.5  | 5.7  | 4.2  | 4.6  |
| 1441068_at   | serine hydroxymethyl transferase 1 (soluble)                  | NM_009171 | 7.1               | 6.6  | 5.4  | 5.8  | 4.8  | 5.6  | 4.9  | 4.6  |
| 1434793_at   | lysosomal membrane glycoprotein 2                             | NM_010685 | 4.8               | 4.4  | 4.1  | 5.2  | 9.2  | 6.3  | 1.7  | 9.0  |
| 1439449_at   | dCMP deaminase                                                | BG069699  | 4.1               | 4.3  | 5.6  | 6.3  | 5.3  | 6.8  | 5.4  | 4.3  |
| 1425569_a_at | RIKEN cDNA E130012A19 gene                                    | BC006054  | 8.8               | 6.0  | 4.0  | 4.4  | 4.2  | 6.4  | 3.5  | 4.5  |
| 1443192_at   | tubulin, beta 3                                               | NM_023279 | 10.2              | 5.9  | 4.5  | 2.0  | 3.8  | 6.9  | 0.6  | 7.0  |
| 1440372_at   | RWD domain containing 2                                       | AK006533  | 8.0               | 7.8  | 4.8  | 6.8  | 2.9  | 2.5  | 2.8  | 4.7  |
| 1446088_at   | cadherin 22                                                   | AB019618  | 3.3               | 4.1  | 6.9  | 3.9  | 5.4  | 8.4  | 1.7  | 6.3  |
| 1458589_at   | X-ray repair compl. defective repair in Chin. hamster cells 5 | AF166486  | 4.3               | 5.0  | 7.4  | 4.3  | 6.6  | 3.7  | 2.0  | 5.9  |
| 1433988_s_at | RIKEN cDNA B230114H05 gene                                    | BM214769  | 4.6               | 5.3  | 5.6  | 3.9  | 7.0  | 5.4  | 2.6  | 4.8  |
| 1444159_at   | expressed sequence AI324154                                   | BQ031094  | 3.9               | 5.1  | 5.3  | 4.4  | 5.4  | 3.1  | 6.1  | 4.6  |
| 1420841_at   | DNA segment Chr13, Wayne State University 177, expressed      | BC012213  | 4.4               | 5.4  | 3.7  | 3.6  | 4.1  | 6.2  | 3.3  | 3.8  |
| 1452928_at   | SET and MYND domain containing 2                              | BC023119  | 6.6               | 5.7  | 2.9  | 3.1  | 3.3  | 4.7  | 3.4  | 4.4  |
| 1457656_s_at | retinoblastoma binding protein 4                              | AU040918  | 5.0               | 6.0  | 3.8  | 4.2  | 3.2  | 3.5  | 4.1  | 3.9  |
| 1443284_at   | leucine aminopeptidase 3                                      | AK010384  | 4.3               | 5.1  | 4.0  | 3.6  | 3.9  | 5.5  | 3.0  | 3.5  |
| 1438570_at   | RNA polymerase 1-4                                            | NM_009088 | 4.4               | 4.2  | 3.9  | 3.6  | 3.8  | 4.6  | 3.3  | 4.2  |
| 1446284_at   | RIKEN cDNA 1110004L07 gene                                    | AK003432  | 6.2               | 6.2  | 3.1  | 3.1  | 3.1  | 3.3  | 3.0  | 3.5  |
| 1459674_at   | MYB binding protein (P160) 1a                                 | BM227247  | 4.3               | 4.0  | 3.4  | 3.6  | 3.8  | 4.9  | 3.1  | 3.1  |

| Probe set    | Gene                                                             | Accession | Lymphoma #          |        |        |       |        |       |       |        |
|--------------|------------------------------------------------------------------|-----------|---------------------|--------|--------|-------|--------|-------|-------|--------|
|              |                                                                  |           | 1                   | 2      | 3      | 4     | 5      | 6     | 7     | 8      |
|              |                                                                  |           | Fold downregulation |        |        |       |        |       |       |        |
| 1457917_at   | Mus musculus transcribed sequences                               | BB200032  | 96.4                | -      | 45.2   | 15.1  | 104.1  | 152.5 | 14.2  | 41.6   |
| 1440721_at   | RIKEN full-length enriched library, clone:5930433N17             | C85455    | -                   | -      | 22.7   | 65.7  | 22.0   | -     | 14.7  | 25.7   |
| 1458058_at   | cDNA, RIKEN full-length enriched library, clone:7030407E18       | AV352368  | 318.4               | -      | 74.9   | -17.8 | 28.1   | -     | 4.3   | 1123.7 |
| 1458309_at   | RIKEN cDNA 9030605E16 [Mus musculus]                             | BM122422  | 78.7                | 29.2   | -      | -     | -      | -     | 2.6   | -      |
| 1439412_at   | Mus musculus transcribed sequences                               | BB167922  | -                   | 55.8   | -      | 148.4 | -      | 71.0  | 6.1   | 120.4  |
| 1427655_a_at | RIKEN cDNA A630038E17 gene                                       | M37694    | -98.4               | -993.0 | 33.8   | 18.2  | -177.6 | 44.3  | 56.5  | 10.1   |
| 1440188_at   | gb:BE980962                                                      | BE980962  | -                   | 1069.7 | 179.7  | 320.1 | -      | -     | 2.6   | 12.1   |
| 1444942_at   | Mus musculus mRNA for mKIAA0054 protein                          | BB277106  | 8.3                 | -      | -      | -     | 17.5   | -     | 4.1   | 74.4   |
| 1429254_at   | aquaporin 11                                                     | BF472491  | -                   | -      | 84.6   | 2.1   | -      | -     | 3.5   | -      |
| 1427532_at   | RIKEN cDNA C030046M14 gene                                       | BB622792  | 50.4                | 26.6   | 20.1   | 19.5  | 21.6   | 16.3  | 5.4   | 19.6   |
| 1439315_at   | cDNA, RIKEN full-length enriched library, clone:A630042G22       | BB233192  | 15.5                | 11.5   | 2124.1 | 15.4  | 18.7   | -     | 3.3   | 34.4   |
| 1445148_at   | cDNA, RIKEN full-length enriched library, clone:C230091K16       | BB041366  | 10.2                | 43.0   | 5.8    | 10.2  | 14.5   | 32.8  | 12.3  | 12.4   |
| 1457063_at   | Mus musculus transcribed sequences                               | AI447357  | 41.6                | 10.7   | 16.1   | 10.5  | 14.0   | 10.5  | 8.3   | 9.6    |
| 1420166_at   | deoxynucleotidyltransferase, terminal                            | BB160593  | 5.0                 | 4.7    | -      | 20.4  | 75.1   | 7.8   | 150.1 | 14.6   |
| 1418065_at   | recombination activating gene 2                                  | NM_009020 | 4.4                 | 6.1    | -      | 39.3  | -      | 60.8  | 4.0   | 31.6   |
| 1438837_at   | Mus musculus transcribed sequences                               | BB198675  | 103.8               | 32.2   | 14.3   | 11.8  | 7.5    | 13.6  | 4.4   | 11.3   |
| 1458050_at   | Mus musculus transcribed sequences                               | BB243259  | 13.9                | 14.4   | 13.6   | 20.8  | 8.1    | 62.5  | 3.8   | 17.6   |
| 1447792_x_at | Mus musculus transcribed sequences                               | BB241847  | -                   | 35.7   | 3.8    | 4.9   | 28.4   | -     | 6.2   | 6.4    |
| 1421604_a_at | Kruppel-like factor 3 (basic)                                    | NM_008453 | 25.7                | 8.9    | 7.7    | 22.0  | 105.0  | -     | 7.0   | 3.7    |
| 1443894_at   | Mus musculus transcribed sequences                               | BB236216  | 279.1               | -      | 7.8    | 8.4   | 16.5   | -     | 2.8   | 10.0   |
| 1451474_a_at | DNA segment, Chr 13, ERATO Doi 275, expressed                    | BC022679  | 45.7                | 10.8   | 8.5    | 11.2  | 7.1    | 14.2  | 8.7   | 7.1    |
| 1457141_at   | Mus musculus transcribed sequences                               | BB229969  | 8.9                 | -      | 85.8   | 3.9   | 14.5   | 82.5  | 2.8   | 21.5   |
| 1447214_at   | Mus musculus transcribed sequences                               | BG094486  | 9.8                 | 8.4    | 13.1   | 40.9  | 6.9    | 17.8  | 3.8   | 58.1   |
| 1439686_at   | Mus musculus transcribed sequences                               | BB235876  | 20.4                | 14.4   | 10.0   | 7.5   | 13.9   | 21.5  | 5.1   | 7.3    |
| 1417481_at   | receptor (calcitonin) activity modifying protein 1               | NM_016894 | 12.5                | 7.6    | 44.1   | 6.6   | 22.2   | 14.1  | 4.4   | 12.3   |
| 1419028_at   | protein phosphatase 1, regulatory (inhibitor) subunit 1C         | NM_033264 | 16.4                | 12.6   | 23.1   | 9.2   | 26.9   | 20.1  | 2.7   | 17.5   |
| 1448929_at   | coagulation factor XIII, alpha subunit                           | NM_028784 | 21.7                | 11.3   | 22.6   | 19.4  | 10.5   | 5.7   | 19.0  | 3.8    |
| 1438894_at   | Mus musculus transcribed sequences                               | BB371643  | 16.9                | 13.6   | 26.2   | 16.9  | 13.0   | 20.1  | 2.6   | 11.1   |
| 1439897_at   | transcribed sequence weak sim. to protein sp:O76041 (H.sapiens)  | BE457796  | 9.5                 | 7.3    | 19.4   | 8.1   | 18.6   | 88.9  | 3.5   | 9.8    |
| 1418776_at   | RIKEN cDNA 5830443L24 gene                                       | NM_029509 | 60.4                | 30.2   | 5.5    | 7.3   | 14.3   | 37.0  | 10.2  | 3.3    |
| 1419480_at   | selectin, lymphocyte                                             | NM_011346 | 30.3                | 12.6   | 5.0    | 6.3   | 15.7   | 47.1  | 6.2   | 6.3    |
| 1418912_at   | plexin domain containing 2                                       | NM_026162 | 9.3                 | 6.6    | 11.6   | 9.2   | 17.2   | 18.7  | 5.1   | 8.0    |
| 1429794_a_at | purinergic receptor P2X, ligand-gated ion channel, 1             | AK007650  | 4.3                 | 2.8    | 587.3  | 33.0  | 41.8   | 25.8  | 5.0   | 455.9  |
| 1447272_s_at | ATPase, class V, type 10A                                        | BM249532  | 30.7                | 15.5   | 15.1   | 7.9   | 14.1   | -     | 2.1   | 11.4   |
| 1443772_at   | cDNA, RIKEN full-length enriched library, clone:B130053A22       | BB202611  | 9.1                 | 5.5    | -      | 67.4  | 13.4   | 5.5   | 3.0   | 35.3   |
| 1449038_at   | hydroxysteroid 11-beta dehydrogenase 1                           | NM_008288 | 6.4                 | 7.9    | 23.4   | 12.5  | 15.5   | 23.7  | 8.8   | 3.4    |
| 1422494_s_at | RIKEN cDNA 4932702G04 gene                                       | NM_053180 | 13.3                | 6.8    | 8.6    | 9.7   | 7.3    | 12.8  | 5.9   | 10.7   |
| 1441068_at   | RIKEN cDNA A130001G05 gene                                       | BB631473  | 25.5                | 20.3   | 14.0   | 13.7  | 9.9    | 28.4  | 2.0   | 15.7   |
| 1434793_at   | hypothetical protein MGC38950                                    | AI851014  | 17.5                | 10.0   | 10.8   | 7.4   | 6.4    | 26.1  | 3.9   | 9.6    |
| 1439449_at   | transcribed sequence str. Sim. to protein pir:A43314 (H.sapiens) | BB724383  | 7.9                 | 11.0   | 65.9   | 13.7  | 11.9   | 92.1  | 2.0   | 21.8   |
| 1425569_a_at | signaling lymphocyte activation molecule                         | AF149791  | 17.4                | 12.2   | 10.7   | 6.3   | 14.7   | 25.2  | 3.6   | 6.0    |
| 1443192_at   | cDNA, RIKEN full-length enriched library, clone:5830487P08       | BB033993  | 13.4                | 15.8   | 10.9   | 13.0  | 5.1    | 23.3  | 2.8   | 17.5   |
| 1440372_at   | Mus musculus transcribed sequences                               | AI785253  | 14.9                | 11.4   | 24.4   | 38.2  | 5.2    | 16.3  | 2.2   | 14.5   |
| 1446088_at   | RIKEN cDNA 9430081I23 gene                                       | BB102291  | 7.5                 | 13.1   | 15.3   | 14.0  | 9.4    | 11.8  | 2.8   | 9.7    |
| 1458589_at   | cDNA, RIKEN full-length enriched library, clone:D430030N05       | BB485297  | 7.9                 | 11.9   | 8.6    | 6.5   | 11.6   | 9.9   | 4.0   | 11.9   |
| 1433988_s_at | RIKEN cDNA C230098O21 gene                                       | BG075755  | 10.5                | 12.5   | 10.4   | 9.1   | 8.2    | 6.3   | 4.8   | 7.4    |
| 1444159_at   | cDNA, RIKEN full-length enriched library, clone:8030444E01       | BM243903  | 13.8                | 13.1   | 18.2   | 19.8  | 8.3    | 24.1  | 1.9   | 13.9   |
| 1420841_at   | protein tyrosine phosphatase, receptor type, F                   | NM_011213 | 8.2                 | 11.4   | 29.3   | 5.4   | 15.2   | 25.0  | 2.7   | 9.6    |
| 1452928_at   | RIKEN cDNA 2210414K06 gene                                       | AK008928  | 13.3                | 6.3    | 6.3    | 8.0   | 12.2   | 9.1   | 7.2   | 5.7    |
| 1457656_s_at | Mus musculus transcribed sequences                               | BB235011  | 6.5                 | 9.8    | 88.6   | 9.8   | 11.9   | 60.2  | 2.0   | 20.4   |
| 1443284_at   | Mus musculus transcribed sequences                               | BB198943  | 5.5                 | 8.2    | -      | 10.1  | 10.0   | 74.7  | 2.1   | 17.5   |
| 1438570_at   | Mus musculus transcribed sequences                               | BE631083  | 6.5                 | 7.5    | 40.4   | 8.9   | 9.1    | 26.8  | 2.5   | 11.9   |
| 1446284_at   | cDNA, RIKEN full-length enriched library, clone:A130035K06       | BB157298  | 15.1                | 17.3   | -      | 13.1  | 7.1    | 5.3   | 2.1   | 15.0   |
| 1459674_at   | Mus musculus transcribed sequences                               | AW907492  | 12.4                | 13.5   | 43.5   | 10.0  | 5.5    | 11.1  | 2.3   | 13.6   |
| 1456235_at   | Mus musculus transcribed sequences                               | BB198406  | 11.2                | 12.9   | 8.8    | 11.4  | 4.7    | 18.7  | 2.8   | 13.0   |
| 1441614_at   | gb:BB229543                                                      | BB229543  | 8.3                 | 12.7   | 11.0   | 11.2  | 5.6    | 18.5  | 2.9   | 8.9    |
| 1437699_at   | RIKEN cDNA E430014B02 gene                                       | BB031353  | 6.5                 | 8.6    | 59.4   | 10.1  | 10.1   | 44.4  | 2.0   | 15.4   |
| 1439203_at   | Mus musculus transcribed sequences                               | BB206010  | 8.5                 | 10.5   | 21.9   | 7.7   | 8.7    | 25.3  | 2.2   | 12.4   |
| 1426438_at   | RIKEN cDNA 8030469F12 gene                                       | BB667072  | -                   | 67.0   | 1.7    | 2.3   | -      | -     | -     | 22.9   |

| Probe set    | Gene                                                                                                                             | Accession | Lymphoma #          |            |             |            |             |            |            |            |
|--------------|----------------------------------------------------------------------------------------------------------------------------------|-----------|---------------------|------------|-------------|------------|-------------|------------|------------|------------|
|              |                                                                                                                                  |           | 1                   | 2          | 3           | 4          | 5           | 6          | 7          | 8          |
|              |                                                                                                                                  |           | Fold downregulation |            |             |            |             |            |            |            |
| 1438125_at   | RIKEN cDNA C230085N15 gene                                                                                                       | BB393897  | 5.2                 | 8.4        | 61.5        | 8.2        | 8.4         | 38.6       | 2.3        | 16.5       |
| 1454295_at   | Mus musculus transcribed sequences                                                                                               | BB041915  | 20.5                | 15.0       | 5.0         | 9.0        | 4.2         | 31.7       | 3.2        | 12.1       |
| 1441769_at   | Mus musculus transcribed sequences                                                                                               | BB731108  | 16.6                | 9.8        | 15.2        | 19.6       | 4.8         | 11.9       | 2.4        | 9.8        |
| 1440326_at   | Mus musculus transcribed sequences                                                                                               | AV312674  | 26.1                | 34.0       | 8.8         | 13.0       | 6.7         | 173.4      | 1.6        | 22.6       |
| 1457582_at   | cDNA, RIKEN full-length enriched library, clone:D930045J11                                                                       | BB528233  | 33.0                | 9.8        | 2.5         | 4.1        | 8.9         | 20.7       | 9.1        | 17.8       |
| 1441418_at   | Mus musculus transcribed sequences                                                                                               | BM240473  | 27.6                | 28.3       | 7.9         | 10.4       | 4.8         | 50.3       | 1.9        | 14.6       |
| 1457549_at   | Mus musculus transcribed sequences                                                                                               | BB043576  | 6.4                 | 18.9       | 17.7        | 17.9       | 4.6         | 20.1       | 2.0        | 23.1       |
| 1460251_at   | tumor necrosis factor receptor superfamily, member 6                                                                             | NM_007987 | 12.4                | 3.8        | 12.2        | 11.2       | 13.6        | 172.5      | 2.4        | 8.2        |
| 1416503_at   | latexin                                                                                                                          | NM_016753 | 9.9                 | 3.9        | 8.9         | 5.7        | -           | -          | 6.5        | 2.8        |
| 1439839_at   | RIKEN cDNA D130051D11 gene                                                                                                       | BB815394  | 6.3                 | 11.0       | 9.7         | 6.1        | 5.5         | 5.9        | 6.8        | 7.9        |
| 1419091_a_at | annexin A2                                                                                                                       | NM_007585 | 22.6                | 9.4        | 4.4         | 6.1        | 11.8        | 3.4        | 11.9       | 6.7        |
| 1440900_at   | cDNA, RIKEN full-length enriched library, clone:5830404C02                                                                       | AV312603  | 13.5                | 7.6        | 4.3         | 5.3        | 9.4         | 9.1        | 6.2        | 6.3        |
| 1441589_at   | Mus musculus transcribed sequences                                                                                               | BB634277  | 27.5                | 28.8       | 8.0         | 12.6       | 5.7         | 50.7       | 1.6        | 15.7       |
| 1441552_at   | cDNA, RIKEN full-length enr. library, cl.:5830474E17<br>product:T-cell receptor alpha chain precursor V-J<br>region(TA72)        | BB032962  | 12.1                | 9.9        | 17.0        | 4.9        | 7.9         | 4.5        | 15.0       | 3.2        |
| 1425792_a_at | RAR-related orphan receptor gamma                                                                                                | AF163668  | 3.3                 | 4.9        | 1404.<br>0  | 6.3        | 22.1        | 95.1       | 2.6        | 15.3       |
| 1438392_at   | Mus musculus transcribed sequences                                                                                               | BM239011  | 10.0                | 11.2       | 9.2         | 7.9        | 6.0         | 9.8        | 2.6        | 9.4        |
| 1458605_at   | Mus musculus transcribed sequences                                                                                               | AW107249  | 13.6                | 11.3       | 11.7        | 13.0       | 4.2         | 8.6        | 2.4        | 10.2       |
| 1453595_at   | RIKEN cDNA 2900064B18 gene                                                                                                       | AV154597  | 12.6                | 28.0       | 8.3         | 9.0        | 4.2         | 9.4        | 2.6        | 9.0        |
| 1440586_at   | RIKEN cDNA B430203I24 gene                                                                                                       | BB326079  | 13.8                | 10.4       | 12.6        | 15.7       | 4.2         | 9.1        | 2.2        | 12.7       |
| 1458974_at   | Mus musculus transcribed sequences                                                                                               | BM245368  | 9.1                 | 9.0        | 11.9        | 10.5       | 5.1         | 14.4       | 2.5        | 7.8        |
| 1438981_at   | Mus musculus transcribed sequences                                                                                               | BB160675  | 9.4                 | 15.4       | 9.3         | 13.0       | 6.1         | 10.8       | 2.0        | 12.2       |
| 1426906_at   | interferon activated gene 205                                                                                                    | M74124    | 127.9               | 14.0       | 3.7         | 3.2        | 9.2         | 26.0       | 7.1        | 3.8        |
| 1448355_at   | protease, serine, 16 (thymus)                                                                                                    | NM_019429 | 6.7                 | 5.6        | 7.1         | 5.3        | 6.3         | 6.1        | 7.0        | 9.9        |
| 1459202_at   | cDNA, RIKEN full-length enriched library, clone:C130034D14                                                                       | BB366565  | 4.1                 | 5.6        | 13.6        | 12.3       | 4.8         | 8.6        | 4.6        | 8.4        |
| 1457377_at   | Mus musculus transcribed sequences                                                                                               | BB253657  | 10.0                | 12.3       | 6.1         | 9.1        | 5.3         | 11.2       | 2.5        | 8.9        |
| 1444224_at   | Mus musculus transcribed sequences                                                                                               | AI550170  | 30.1                | 97.0       | 8.5         | 9.4        | 4.9         | 10.2       | 2.1        | 4.9        |
| 1433719_at   | hypothetical protein 9930105B05                                                                                                  | AI854429  | 4.6                 | 7.2        | 6.6         | 5.9        | 11.5        | 11.1       | 5.3        | 4.7        |
| 1456678_at   | cDNA, RIKEN full-length enriched library, clone:A130058I09                                                                       | AV314270  | 15.1                | 24.1       | 6.3         | 7.7        | 5.0         | 25.9       | 1.9        | 12.1       |
| 1459362_at   | Mus musculus transcribed sequences                                                                                               | BB033588  | 10.7                | 13.0       | 7.6         | 8.9        | 5.4         | 14.5       | 2.0        | 11.5       |
| 1438452_at   | RIKEN cDNA A630080F05 gene                                                                                                       | BM121794  | 7.7                 | 5.1        | 16.8        | 6.8        | 10.9        | 10.7       | 2.6        | 6.4        |
| 1441762_at   | cDNA, RIKEN full-length enriched library, clone:5830468D02                                                                       | BM877183  | 4.0                 | 6.9        | 15.7        | 9.1        | 8.2         | 8.9        | 2.4        | 26.1       |
| 1439895_at   | transcribed seq. mod. sim. to protein pir:S12207<br>(M.musculus)                                                                 | BG069874  | 11.1                | 10.5       | 9.7         | 12.3       | 4.1         | 10.1       | 2.3        | 8.0        |
| 1446711_at   | RIKEN cDNA A130040G06 gene                                                                                                       | BB165609  | 7.5                 | 10.2       | 8.1         | 5.7        | 6.2         | 11.7       | 2.5        | 9.3        |
| 1460745_at   | RIKEN cDNA A630098A13 gene                                                                                                       | AI327345  | 2.4                 | 5.8        | 8.3         | 6.7        | 11.3        | 10.6       | 7.4        | 8.7        |
| 1457184_at   | Mus musculus transcribed sequences                                                                                               | BB472173  | 5.6                 | 10.8       | 7.3         | 8.0        | 4.1         | 9.2        | 2.9        | 17.8       |
| 1431118_at   | RIKEN cDNA 6720427H10 gene                                                                                                       | BB664131  | 10.8                | 9.1        | 9.9         | 11.1       | 3.8         | 11.7       | 2.3        | 7.7        |
| 1444293_at   | Mus musculus, clone IMAGE:1328084, mRNA                                                                                          | BB204970  | <b>3.5</b>          | <b>5.5</b> | <b>17.2</b> | <b>7.5</b> | <b>13.4</b> | <b>8.7</b> | <b>3.1</b> | <b>6.8</b> |
| 1441058_at   | RIKEN cDNA E130307H12 gene                                                                                                       | BB434111  | 11.2                | 8.3        | 7.9         | 9.1        | 5.8         | 8.4        | 2.2        | 7.6        |
| 1456426_at   | Mus musculus transcribed sequences                                                                                               | BE686253  | 7.7                 | 3.7        | 4.0         | 5.7        | 11.9        | 105.3      | 6.5        | 4.0        |
| 1420515_a_at | RIKEN cDNA C730002N09 gene                                                                                                       | NM_021319 | 9.1                 | 6.5        | 8.5         | 2.1        | 22.7        | -          | 4.9        | 4.2        |
| 1449831_at   | RIKEN cDNA 1700055O19 gene                                                                                                       | NM_026100 | 5.3                 | 4.7        | 5.2         | 6.6        | 8.5         | 13.0       | 3.7        | 8.6        |
| 1423549_at   | solute carrier family1 (glutamate/neutral aa transporter),<br>member 4                                                           | BB762524  | 2.6                 | 4.7        | 18.6        | 17.6       | 6.3         | 8.1        | 7.5        | 4.6        |
| 1446950_at   | Mus musculus transcribed sequences                                                                                               | BM124834  | 7.3                 | 10.6       | 9.0         | 7.8        | 5.0         | 10.7       | 2.4        | 6.4        |
| 1443534_at   | Mus musculus transcribed sequences                                                                                               | BM201095  | 19.2                | 13.4       | 4.3         | 5.8        | 5.4         | 26.5       | 2.4        | 5.8        |
| 1451846_at   | RIKEN cDNA 1200007O21 gene                                                                                                       | BC025863  | 20.8                | 8.5        | 11.9        | 4.1        | 8.4         | 7.3        | 2.6        | 4.7        |
| 1424903_at   | selected mouse cDNA on the Y                                                                                                     | AF127244  | 27.9                | 22.2       | 1.6         | 2.3        | 20.9        | 23.4       | 29.4       | 11.3       |
| 1443349_at   | Mus musculus transcribed sequences                                                                                               | BB211894  | 246.8               | 16.0       | 2.5         | 3.5        | 6.5         | 30.1       | 4.0        | 5.3        |
| 1458263_at   | Mus musculus transcribed sequences                                                                                               | BE979587  | 25.9                | 15.5       | 3.2         | 5.0        | 3.7         | 415.8      | 2.6        | 8.8        |
| 1431110_at   | RIKEN cDNA 5430431D22 gene                                                                                                       | AK017369  | 6.6                 | 3.4        | 23.4        | 4.7        | 6.4         | -          | 2.5        | 5.5        |
| 1443094_at   | expressed sequence BB031773                                                                                                      | BB031311  | 5.5                 | 45.2       | 6.2         | 8.7        | 3.6         | 7.0        | 2.5        | 11.8       |
| 1451475_at   | Mus musculus mRNA for mKIAA0620 protein                                                                                          | BC019530  | 26.1                | 7.7        | 5.6         | 5.5        | 33.1        | -          | 2.0        | 2.8        |
| 1421386_at   | ankyrin repeat domain 6                                                                                                          | NM_080471 | <b>9.5</b>          | <b>7.1</b> | <b>7.2</b>  | <b>4.3</b> | <b>5.6</b>  | <b>8.7</b> | <b>3.0</b> | <b>6.1</b> |
| 1456685_at   | Mus musculus transcribed sequences                                                                                               | BB227199  | 13.2                | 6.2        | 3.2         | 5.8        | 5.9         | 8.9        | 4.2        | 5.7        |
| 1446476_at   | cDNA, RIKEN full-length enriched library, clone:5830404G23<br>product:T-cell receptor alpha chain precursor V-J region<br>(TA72) | AV312643  | 6.6                 | 12.5       | 3.8         | 3.5        | 2.4         | 34.6       | 31.0       | 6.2        |
| 1418777_at   | chemokine (C-C motif) ligand 25                                                                                                  | NM_009138 | 7.6                 | 5.0        | 12.3        | 3.1        | 7.7         | 13.3       | 3.4        | 5.1        |
| 1426721_s_at | expressed sequence AW558171                                                                                                      | BB667071  | 5.6                 | 3.4        | 5.5         | 7.0        | 6.7         | 13.2       | 3.7        | 7.2        |
| 1456650_at   | cDNA, RIKEN full-length enriched library, clone:A030010B11                                                                       | BB150912  | 2.8                 | 10.0       | 6.5         | 7.0        | 5.8         | 75.0       | 3.5        | 4.6        |

| Probe set    | Gene                                                           | Accession | Lymphoma #          |      |      |      |      |      |     |      |
|--------------|----------------------------------------------------------------|-----------|---------------------|------|------|------|------|------|-----|------|
|              |                                                                |           | 1                   | 2    | 3    | 4    | 5    | 6    | 7   | 8    |
|              |                                                                |           | Fold downregulation |      |      |      |      |      |     |      |
| 1445426_at   | gb:BB457090                                                    | BB457090  | 10.0                | 4.9  | 6.9  | 26.1 | 10.5 | 8.1  | 1.8 | 5.2  |
| 1446272_at   | PCTAIRE-motif protein kinase 2                                 | BB200545  | 2.8                 | 6.2  | 16.2 | 6.5  | 8.2  | 26.8 | 2.2 | 9.8  |
| 1434473_at   | Mus musculus cDNA clone IMAGE:3471887, partial cds             | AI647939  | 3.9                 | 6.1  | 8.2  | 4.1  | 11.0 | 12.3 | 3.3 | 5.1  |
| 1431014_at   | cat eye syndrome chrom. region, candidate 2 homolog (human)    | AK013061  | 4.6                 | 6.0  | 13.4 | 7.3  | 3.7  | 6.2  | 3.8 | 6.0  |
| 1447458_at   | RIKEN cDNA 9330161A08 gene                                     | BE954474  | 5.7                 | 14.5 | 5.9  | 9.6  | 4.5  | 4.3  | 2.5 | 10.2 |
| 1443947_at   | RIKEN cDNA C430041B13 gene                                     | BB415206  | 41.8                | 3.5  | 3.1  | 6.4  | 3.2  | -    | 2.6 | 11.7 |
| 1419226_at   | T cell activation, increased late expression                   | NM_032465 | 7.7                 | 4.8  | 14.1 | 4.9  | 6.5  | 8.3  | 2.8 | 4.2  |
| 1427184_at   | T-cell receptor beta, variable 8.2                             | BF318536  | 2.5                 | 6.3  | 6.0  | 6.5  | 5.6  | -    | 7.8 | 3.5  |
| 1436154_at   | Mus musculus transcribed sequences                             | BE457918  | 2.6                 | 5.2  | 14.7 | 5.5  | 9.2  | 8.3  | 3.3 | 8.7  |
| 1437584_at   | Mus musculus transcribed sequences                             | BE685667  | 5.6                 | 11.3 | 10.4 | 8.9  | 3.9  | 9.6  | 1.7 | 12.1 |
| 1438960_at   | Mus musculus transcribed sequences                             | BB164652  | 21.5                | 10.5 | 4.0  | 11.8 | 2.9  | 15.5 | 1.8 | 14.6 |
| 1417141_at   | interferon gamma induced GTPase                                | NM_018738 | 10.6                | 5.8  | 5.1  | 3.7  | 11.1 | 10.0 | 6.8 | 2.2  |
| 1454788_at   | RIKEN cDNA A630084M22 gene                                     | BQ176306  | 4.1                 | 5.1  | 8.7  | 4.3  | 16.3 | 28.9 | 2.1 | 6.0  |
| 1445612_at   | cDNA, RIKEN full-length enriched library, clone:F830035K10     | AI114898  | 4.8                 | 9.1  | 7.8  | 7.5  | 4.1  | 11.9 | 2.3 | 4.9  |
| 1443144_at   | RIKEN cDNA A130082F03 gene                                     | BB084315  | 3.5                 | 6.6  | 6.6  | 4.0  | 6.8  | 6.3  | 4.3 | 5.8  |
| 1429690_at   | RIKEN cDNA 1300003B13 gene                                     | AK004870  | 6.3                 | 8.8  | 4.6  | 5.6  | 3.6  | 14.8 | 2.8 | 5.4  |
| 1449875_s_at | histocompatibility 2, T region locus 10                        | NM_010395 | 8.4                 | 5.3  | 4.7  | 4.6  | 8.7  | 9.3  | 2.7 | 4.5  |
| 1436864_at   | Mus musculus transcribed sequences                             | BM214060  | 7.7                 | 4.6  | 8.2  | 9.8  | 4.5  | 8.4  | 2.0 | 6.8  |
| 1444005_at   | Mus musculus transcribed sequences                             | AI529516  | 10.9                | 9.9  | 9.8  | 5.3  | 4.7  | 4.2  | 2.1 | 6.6  |
| 1417293_at   | heparan sulfate 6-O-sulfotransferase 1                         | NM_015818 | 6.8                 | 4.9  | 7.5  | 6.0  | 4.3  | 5.6  | 4.2 | 3.6  |
| 1422064_a_at | zinc finger protein 288                                        | AY028963  | 6.1                 | 4.4  | 2.6  | 4.2  | 11.1 | 9.1  | 4.5 | 6.9  |
| 1425785_a_at | TXK tyrosine kinase                                            | U19607    | 5.6                 | 8.7  | 6.1  | 2.6  | 8.5  | 11.7 | 2.6 | 6.5  |
| 1439981_at   | RIKEN cDNA A430001F24 gene                                     | BB198298  | 6.0                 | 6.3  | 5.3  | 5.4  | 4.2  | 12.6 | 2.7 | 4.8  |
| 1456274_at   | cDNA, RIKEN full-length enriched library, clone:C230071H18     | BB067544  | 7.3                 | 10.9 | 4.8  | 5.3  | 4.5  | 7.9  | 2.2 | 5.5  |
| 1438906_at   | cDNA, RIKEN full-length enriched library, clone:A130030I02     | BB156385  | 18.6                | 22.6 | 3.5  | 6.7  | 3.0  | 15.3 | 1.8 | 7.9  |
| 1440103_at   | Mus musculus transcribed sequences                             | AV351137  | 5.4                 | 7.8  | 5.2  | 5.1  | 4.3  | 5.1  | 3.7 | 4.8  |
| 1418633_at   | Notch gene homolog 1 (Drosophila)                              | NM_008714 | 9.3                 | 11.7 | 3.4  | 3.1  | 5.6  | 4.9  | 5.6 | 4.0  |
| 1443012_at   | cDNA, RIKEN full-length enriched library, clone:B130008C17     | BB291827  | 10.0                | 9.9  | 4.3  | 6.2  | 3.9  | 17.8 | 1.7 | 7.5  |
| 1456806_at   | RIKEN cDNA A130010C12 gene                                     | BB153010  | 6.9                 | 9.4  | 6.3  | 6.1  | 3.9  | 5.7  | 2.1 | 7.1  |
| 1445106_at   | Mus musculus transcribed sequences                             | BB066105  | 10.2                | 9.9  | 4.1  | 6.9  | 4.6  | 17.6 | 1.8 | 5.3  |
| 1418968_at   | RB1-inducible coiled-coil 1                                    | AB050017  | 4.0                 | 3.1  | 5.6  | 6.1  | 6.0  | 20.3 | 3.1 | 6.0  |
| 1444350_at   | schlafen 10                                                    | BB227643  | 3.1                 | 9.2  | 5.3  | 3.4  | 7.3  | -    | 2.7 | 4.6  |
| 1431961_at   | RIKEN cDNA 5830472H07 gene                                     | AK018051  | 6.6                 | 6.4  | 3.4  | 4.6  | 4.5  | 11.5 | 3.0 | 5.3  |
| 1429196_at   | RIKEN cDNA 5830411O09 gene                                     | BB431654  | 4.3                 | 1.7  | 14.1 | 7.3  | 8.6  | 11.6 | 3.6 | 7.5  |
| 1460003_at   | Mus musculus transcribed sequences                             | AV234963  | 4.6                 | 3.8  | 5.6  | 4.9  | 4.9  | 7.2  | 3.6 | 5.7  |
| 1421512_at   | centrosomal protein 2                                          | NM_008383 | 3.5                 | 4.3  | 5.2  | 6.7  | 6.4  | 11.0 | 2.9 | 4.6  |
| 1441253_at   | cDNA, RIKEN full-length enriched library, clone:D330006I11     | BB474427  | 11.5                | 7.6  | 5.0  | 6.5  | 2.9  | 7.5  | 2.3 | 5.4  |
| 1437136_at   | RIKEN cDNA 5830436I19 gene                                     | AV316469  | 5.5                 | 11.6 | 9.5  | 8.4  | 3.1  | 6.2  | 1.7 | 8.5  |
| 1438805_at   | RIKEN cDNA 9230106B05 gene                                     | BE691816  | 2.6                 | 3.7  | 10.9 | 6.2  | 5.5  | 10.8 | 2.4 | 11.2 |
| 1437821_at   | cDNA, RIKEN full-length enriched library, clone:C430005H19     | BB408240  | 11.8                | 10.4 | 3.5  | 5.5  | 3.5  | 14.1 | 1.9 | 6.4  |
| 1436398_at   | cDNA, RIKEN full-length enriched library, clone:A130028J07     | BB033554  | 5.0                 | 6.1  | 5.6  | 7.7  | 3.9  | 6.3  | 2.1 | 7.0  |
| 1429060_at   | RIKEN cDNA 9430072K23 gene                                     | AK020483  | 4.6                 | 5.8  | 5.3  | 5.0  | 3.7  | 11.4 | 2.7 | 5.3  |
| 1445881_at   | RIKEN cDNA 2310035P21 gene                                     | BG230003  | 6.1                 | 9.7  | 4.7  | 6.5  | 3.0  | 6.4  | 2.2 | 7.8  |
| 1443400_at   | transcribed seq. mod. sim. to protein pir:S12207 (M.musculus)  | BG060869  | 6.2                 | 8.1  | 4.4  | 5.4  | 3.1  | 12.0 | 2.2 | 5.8  |
| 1445615_at   | Mus musculus transcribed sequences                             | BE852824  | 5.3                 | 3.6  | 5.6  | 4.5  | 3.5  | 5.8  | 3.8 | 6.9  |
| 1445252_at   | cDNA, RIKEN full-length enriched library, clone:C130070D21     | BB373408  | 3.5                 | 7.4  | 4.9  | 5.4  | 6.4  | 3.1  | 3.2 | 6.6  |
| 1439209_at   | cDNA, RIKEN full-length enriched library, clone:E130109D23     | BB540782  | 7.2                 | 8.1  | 4.2  | 5.1  | 3.5  | 17.3 | 1.7 | 7.5  |
| 1451310_a_at | cathepsin L                                                    | J02583    | 9.5                 | 5.1  | 3.0  | 7.1  | 2.2  | 6.9  | 5.9 | 4.8  |
| 1422287_at   | per-hexamer repeat gene 2                                      | NM_008833 | 5.5                 | 8.7  | 4.5  | 4.2  | 4.1  | 4.8  | 3.2 | 4.0  |
| 1459695_at   | Mus musculus transcribed sequences                             | AU040352  | 5.5                 | 7.0  | 3.5  | 3.9  | 3.7  | 5.6  | 3.4 | 5.7  |
| 1438762_at   | Mus musculus transcribed sequences                             | AI604411  | 9.5                 | 9.3  | 3.7  | 4.9  | 3.3  | 13.0 | 1.7 | 7.2  |
| 1458947_at   | Mus musculus transcribed sequences                             | AV341977  | 7.3                 | 11.3 | 2.5  | 3.7  | 4.1  | 6.8  | 2.8 | 6.2  |
| 1430585_at   | RIKEN cDNA 5930436O19 gene                                     | BG798082  | 5.4                 | 6.1  | 4.0  | 4.6  | 3.0  | 8.2  | 2.7 | 5.3  |
| 1441319_at   | RIKEN cDNA D030069N10 gene                                     | BB449095  | 4.4                 | 8.7  | 5.2  | 5.1  | 3.3  | 10.8 | 1.8 | 5.8  |
| 1446551_at   | cDNA, RIKEN full-length enriched library, clone:A130081C01     | BB165047  | 3.9                 | 6.1  | 5.0  | 4.3  | 3.2  | 7.4  | 2.7 | 5.8  |
| 1457782_at   | Mus musculus transcribed sequences                             | BB045512  | 6.9                 | 18.0 | 4.6  | 4.3  | 3.5  | 3.9  | 2.2 | 4.7  |
| 1444473_at   | Mus musculus transcribed sequences                             | BM240241  | 5.2                 | 7.8  | 3.7  | 6.0  | 3.8  | 6.1  | 2.1 | 5.2  |
| 1446592_at   | cDNA, RIKEN full-length enriched library, clone:D230005P03     | BB466044  | 5.5                 | 7.8  | 4.1  | 4.3  | 3.6  | 8.7  | 2.1 | 4.7  |
| 1441556_at   | Mus musculus transcribed sequences                             | BB476958  | 4.5                 | 5.3  | 7.0  | 4.0  | 4.1  | 4.1  | 2.1 | 9.2  |
| 1444676_at   | cDNA, RIKEN full-length enriched library, clone:A430066N02     | BB205578  | 9.0                 | 9.6  | 3.7  | 3.5  | 3.8  | 6.4  | 1.9 | 6.3  |
| 1423597_at   | aminophospholipid transporter (APLT), classI, type 8A, member1 | BB303874  | 7.9                 | 3.9  | 2.1  | 3.5  | 6.9  | 20.0 | 3.8 | 3.5  |

| Probe set  | Gene                                                       | Accession | Lymphoma #          |     |     |     |     |      |     |     |
|------------|------------------------------------------------------------|-----------|---------------------|-----|-----|-----|-----|------|-----|-----|
|            |                                                            |           | 1                   | 2   | 3   | 4   | 5   | 6    | 7   | 8   |
|            |                                                            |           | Fold downregulation |     |     |     |     |      |     |     |
| 1417756_at | lymphocyte specific 1                                      | NM_019391 | 12.4                | 5.5 | 2.5 | 2.6 | 6.9 | 10.4 | 3.1 | 3.5 |
| 1426505_at | ecotropic viral integration site 2B                        | BB201368  | 9.8                 | 7.0 | 4.2 | 3.3 | 5.5 | 7.8  | 2.3 | 2.6 |
| 1416091_at | microtubule-associated protein 4                           | NM_008633 | 5.2                 | 4.1 | 6.2 | 3.9 | 5.5 | 5.4  | 1.9 | 5.0 |
| 1441354_at | Mus musculus transcribed sequences                         | BG069312  | 3.6                 | 5.5 | 3.7 | 6.8 | 3.0 | 5.1  | 2.6 | 6.4 |
| 1430367_at | RIKEN cDNA 8230401J17 gene                                 | BE331859  | 6.9                 | 6.8 | 7.1 | 4.7 | 3.2 | 4.1  | 1.9 | 4.3 |
| 1452145_at | hexose-6-phosphate dehydrogenase (glucose 1-dehydrogenase) | BC027358  | 3.5                 | 3.7 | 6.4 | 4.2 | 6.6 | 6.3  | 2.4 | 3.4 |
| 1441505_at | cDNA, RIKEN full-length enriched library, clone:A430105J09 | BB211484  | 4.7                 | 5.5 | 4.0 | 5.5 | 2.8 | 6.3  | 2.3 | 5.7 |
| 1440905_at | Mus musculus transcribed sequences                         | AI451467  | 8.5                 | 8.5 | 4.0 | 3.5 | 3.3 | 6.2  | 1.9 | 4.7 |
| 1444051_at | RIKEN cDNA 1700019D03 gene                                 | AA215046  | 4.7                 | 5.6 | 3.6 | 4.4 | 3.7 | 9.3  | 2.1 | 4.2 |
| 1419221_at | regulator of G-protein signaling 14                        | NM_016758 | 5.2                 | 3.5 | 4.4 | 3.9 | 4.6 | 3.2  | 3.3 | 3.9 |
| 1425123_at | cDNA sequence BC025816                                     | BC025816  | 3.9                 | 3.1 | 4.3 | 3.9 | 5.2 | 3.5  | 3.7 | 3.4 |
| 1451234_at | cDNA sequence BC021381                                     | BC021381  | 3.2                 | 3.3 | 4.0 | 4.7 | 4.2 | 4.3  | 2.3 | 4.9 |

-: the expression is below background
