# Supplementary material
Source: PubMed Central journal article supplement (PMC1890819)

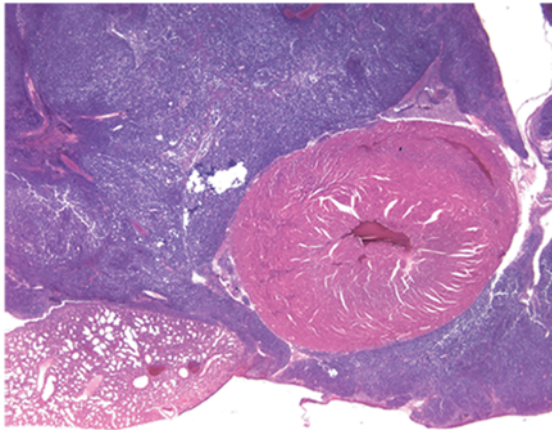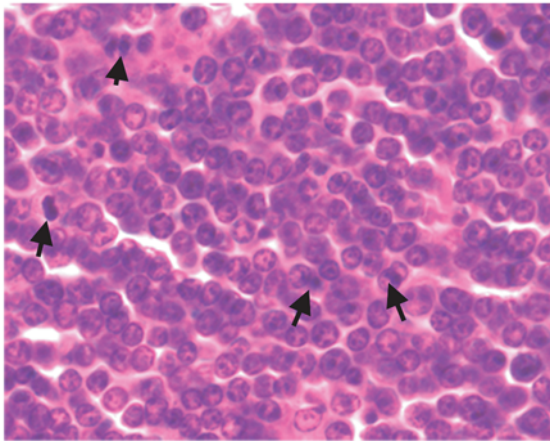

Supplement: blood_blood-2006-11-059071_3.pdf [file blood_blood-2006-11-059071_3.pdf]

A

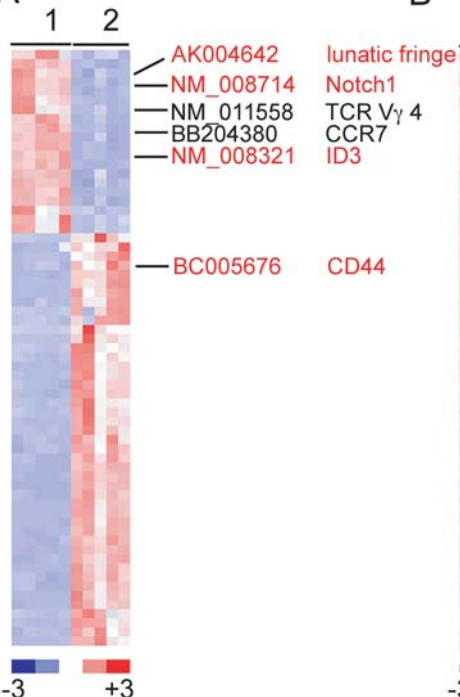

B

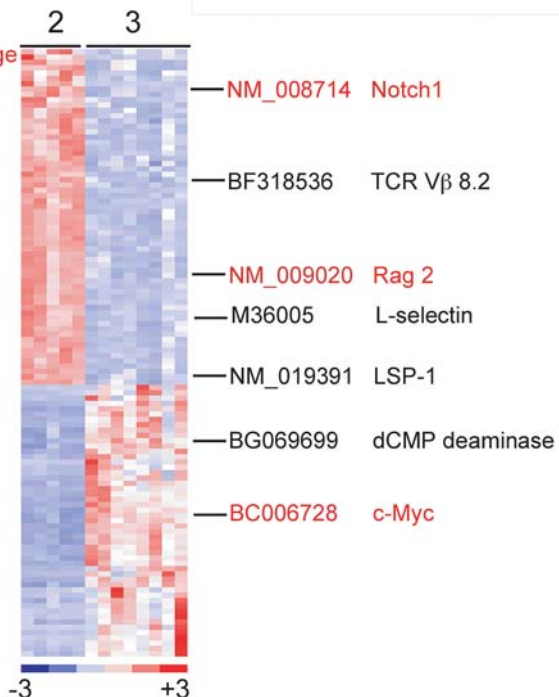

Supplement: blood_blood-2006-11-059071_4.pdf [file blood_blood-2006-11-059071_4.pdf]
